# Supplementary material for: Preliminary Assessment of the Geological and Mining Heritage of the Golden Quadrilateral (Metaliferi Mountains, Romania) as a Potential Geotourism Destination
Source: MDPI journal article supplement (doi:10.3390/su131810114), 2021-09-09
Supplement: s1 [file s1]

## SUPPLEMENTARY MATERIALS

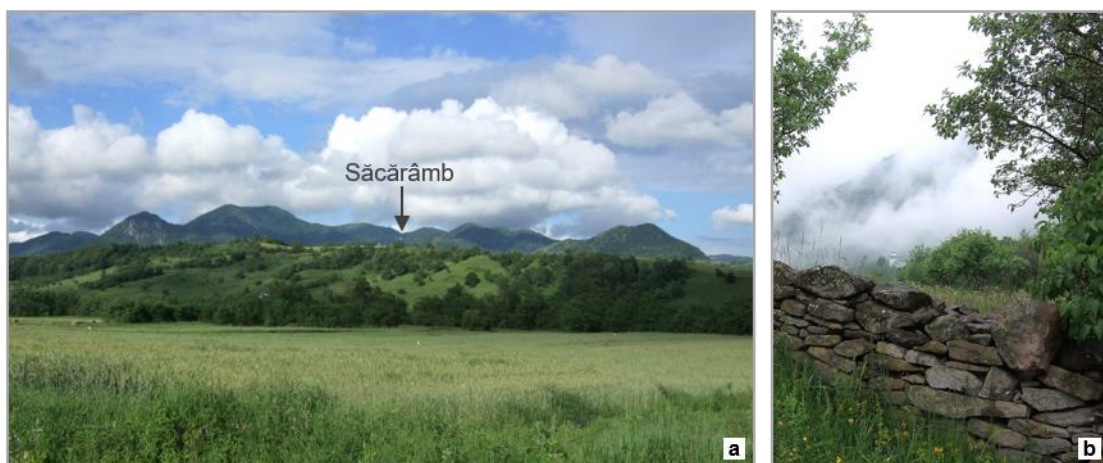

**Figure S1.** Săcărâmb Village (Certejul de Sus commune; Hunedoara County): an old mining locality (nearly 250 years of continuous mining), world-famous for the epithermal gold-silver-telluride ore deposit related to Neogene magmatic activity; type locality for eight minerals. (a) Panoramic view of the southeast end of the Brad – Săcărâmb Neogene volcanic area, showing the location of Săcărâmb Village. (b) Image taken in Săcărâmb Village. In the foreground, an old dry stone fence made of blocks of andesites.

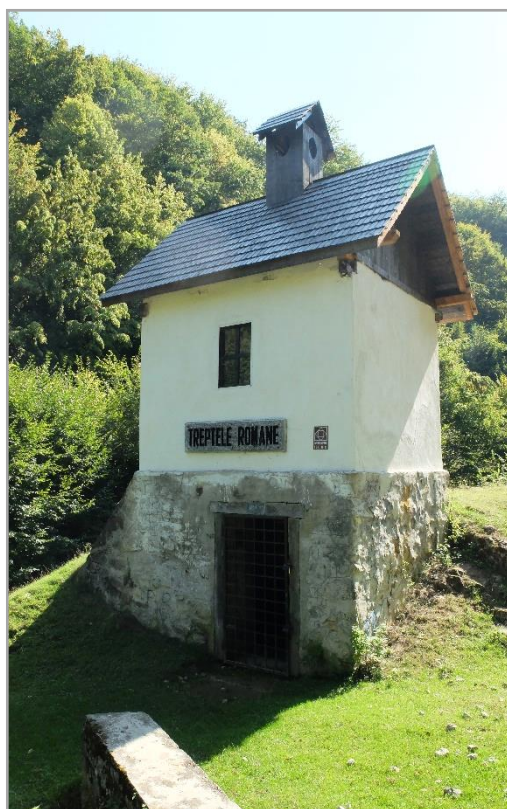

**Figure S2.** “Roman Stairs” mine gallery (Ruda-Brad Village; Brad Town, Hunedoara County). It is a historical monument of national interest (archaeological site and mining industrial architecture from Roman times — 2nd to 3rd centuries A.D.) [28,31]. The photograph shows the mine entrance.

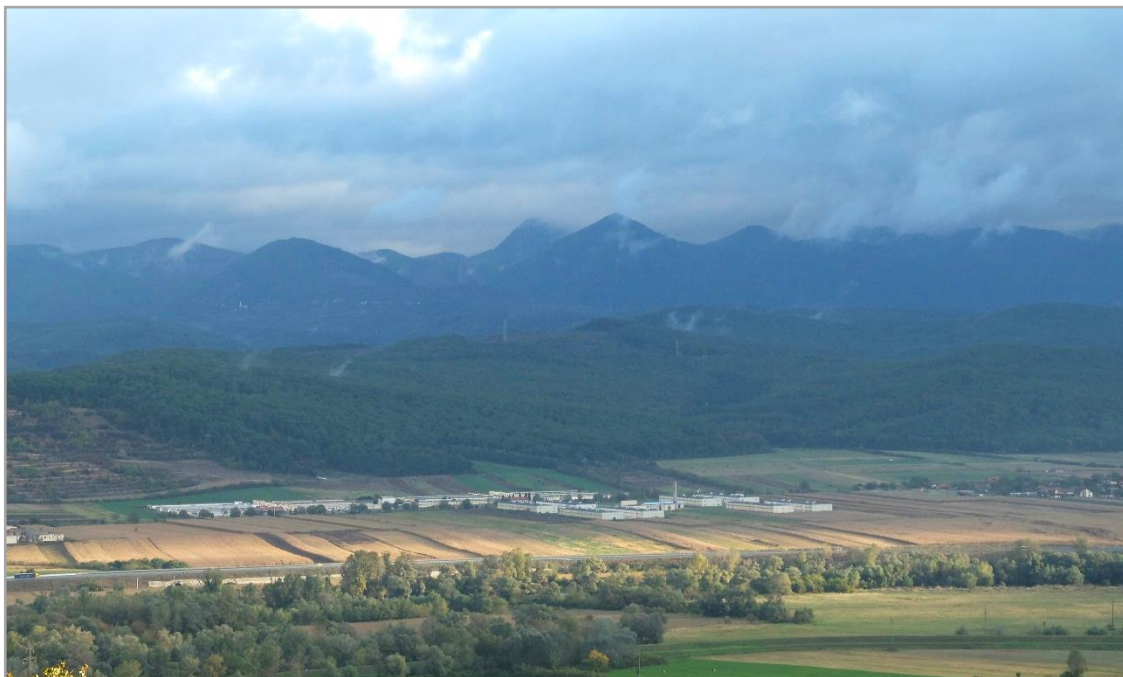

**Figure S3.** Panoramic view (to the northeast) of the Metaliferi Mountains, showing typical volcanic landforms. In the foreground, A1 highway runs almost parallel to Mureș River (the river is not visible on image because of vegetation). Image taken from the upper part of the Citadel Hill (Deva City, Hunedoara County).
